# Supplementary material
Source: MDPI journal article supplement (https://www.mdpi.com/1424-8247/15/7/828)
Supplement: s1 [file s1]

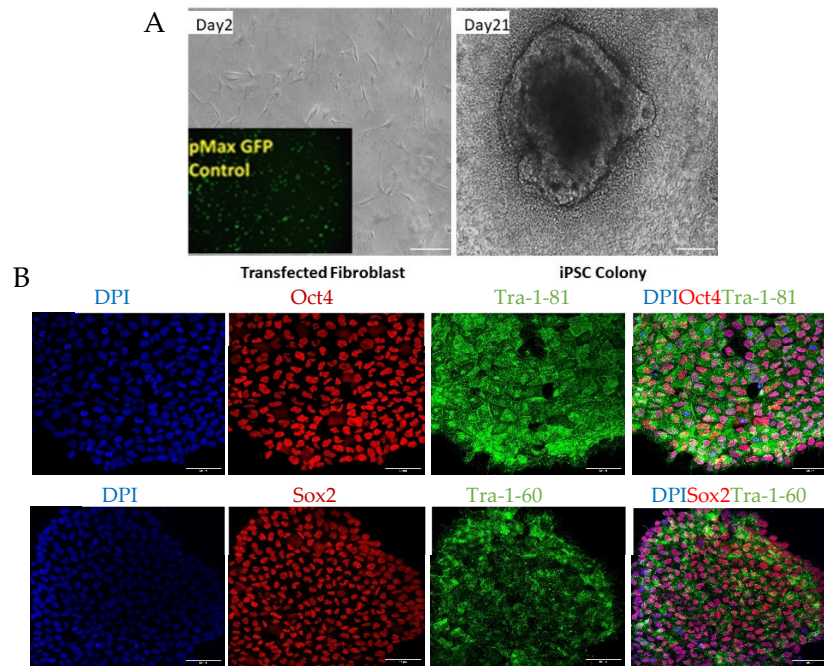

Figure S1: (A) Phase contrast imaging of fibroblasts and the control transfection efficiently with GFP plasmid (in left bottom square) within 24Hrs post transfection and appearance of the hiPSCs colonies after the reprogramming. (b) immunostaining images of the reprogrammed hiPSCs colonies, highly expressed colonies were showing expression of Oct 4 (red), TRA-1-60 (Green) and SOX2 (red). Overlay images are shown merged with nuclear staining with DAPI (blue). Colonies were maintained in recommended media E8 for several passages after picking them from day 21 to Day 30

**Table S1. Primer sequences for gene expression analysis**

| Primer sequences from the Universal Probe Library (UPL) |                            |                            |                  |
|---------------------------------------------------------|----------------------------|----------------------------|------------------|
| Gene Symbol                                             | Forward Primer Sequence    | Reverse Primer Sequence    | UPL probe Number |
| CYP1A1                                                  | CCAGGCTCCAAGAGTCCA         | GATCTTGGAGGTGGCTGCT        | 33               |
| CYP1B1                                                  | ACGTACCGGCCACTATCACT       | CTCGAGTCTGCACATCAGGA       | 20               |
| ARNT1                                                   | CCCAACTTGGACCCCTACTAC      | TCTTAGCAGTAGCCTGGGTAGC     | 113              |
| ARNT2                                                   | GTCAGACTGAAGTGTTCCAGGAC    | CAGTCCCCTGGGTTGGAT         | 44               |
| GAPDH                                                   | CTCTGCTCCTCTGTTCGAC        | ACGACCAAATCCGTTGACTC       | 60               |
| AhRR                                                    | CAAAACCCAGAGCAGACACC       | CAGTTCCGATTGCGACAGA        | 77               |
| AHR                                                     | CAGAGTCTGGACAAGGAATTGA     | TCTGGAGGAATCTGGTCTGG       | 54               |
| Calretinin                                              | GCT CCA GGA ATA CAC CCA AA | CAG CTC ATG CTC GTC AAT GT | NA               |
| Hoxb9                                                   | TAA TCA AAG ACC CGG CTA CG | CTA CGG TCC CTG GTG AGG TA | NA               |
| Olig2                                                   | CAG AAG CGC TGA TGG TCA TA | TCG GCA GTT TTG GGT TAT TC | NA               |
| PAX6                                                    | GGG CAA TCG GTG GTA GTA AA | CTA GCC AGG TTG CGA AGA AC | NA               |
| Chat                                                    | ACTGGGTGTCTGAGTACTGG       | TTGGAAGCCATTTTGACTAT       | NA               |
| Sox1                                                    | AAT CCC CTC TCA GAC GGT G  | TTG ATG CAT TTT GGG GGT AT | NA               |

\*NA: Not applicable

**Table S2 : List and dilutions of antibodies used for immunofluorescence staining**

| Antibody                             | Company                         | Catalogue | Dilution |
|--------------------------------------|---------------------------------|-----------|----------|
| mouse anti-Tra1-60                   | Cell Signalling<br>(,Technology | 4746      | 1:500    |
| mouse anti-Tra1-81                   | Cell Signalling<br>Technology   | 4745      | 1:500    |
| mouse anti-SSEA4                     | Cell Signalling<br>Technology   | 4755      | 1:500    |
| mouse anti-OCT4                      | Cell Signalling<br>Technology   | 2750      | 1:200    |
| rabbit anti- $\beta$ 3-tubulin, Tuj1 | Cell Signalling<br>Technology   | 8572      | 1:200    |
| rabbit anti-neurofilament            | Cell Signalling<br>Technology   | 8572      | 1:200    |
| PSANCAM                              | Abcam                           | ab69763   | 1:400    |
| rabbit anti-MAP2                     | Cell Signalling<br>Technology   | 4542      | 1:400    |
| Mouse anti-AhR antibody              | Santa Cruz<br>Biotechnology     | sc-133088 | 1:500    |
| donkey anti-mouse Alexa Fluor 488    | Life Technology                 | A-11094   | 1:500    |
| donkey anti-rabbit 568               | Life Technology                 | A10042    | 1:500    |

**Table S3: Active and passive electrophysiological properties of hiPSC-derive neurons.**

| ectrophysiological properties | Cells with a complex current pattern |        | Cells with an outwardly rectifying current pattern |        |
|-------------------------------|--------------------------------------|--------|----------------------------------------------------|--------|
| $V_m$ [mV]                    | -53.3 $\pm$ 1.9                      | (n=23) | -56.3 $\pm$ 1.4                                    | (n=64) |
| IR [M $\Omega$ ]              | 591.1 $\pm$ 91.2                     | (n=23) | 1497.4 $\pm$ 80.7                                  | (n=64) |
| $C_m$ [pF]                    | 14.4 $\pm$ 1.3                       | (n=23) | 10.7 $\pm$ 0.3                                     | (n=64) |
| $K_A$ [pA]                    | 320.5 $\pm$ 38.7                     | (n=7)  | 288.0 $\pm$ 23.0                                   | (n=41) |
| $K_{DR}$ [pA]                 | 371.8 $\pm$ 32.5                     | (n=23) | 582.5 $\pm$ 19.3                                   | (n=64) |
| $K_{IR}$ [pA]                 | 37.9 $\pm$ 3.2                       | (n=23) | no currents                                        |        |
| $Na^+$ [pA]                   | 189.6 $\pm$ 80.0                     | (n=2)  | 437.7 $\pm$ 31.2                                   | (n=56) |

$V_m$ , membrane potential; IR, input resistance;  $C_m$ , membrane capacitance;  $K_A$ , fast activating outwardly rectifying  $K^+$  currents;  $K_{DR}$ , delayed outwardly rectifying  $K^+$  currents;  $K_{IR}$ , inwardly rectifying  $K^+$  currents;  $Na^+$ , voltage-dependent  $Na^+$  channels; n, number of cells
